# 1 A scalable open-source framework for machine learning based image collection, 2 annotation and classification: a case study for automatic fish species identification

3  
4 **Authors:** Catarina NS Silva<sup>1</sup>, Justas Dainys<sup>1</sup>, Sean Simmons<sup>2</sup>, Vincentas Vienožinskis<sup>3</sup>, Asta  
5 Audzijonyte<sup>1,4</sup>

6  
7 <sup>1</sup> Nature Research Centre, Vilnius, Lithuania

8 <sup>2</sup> MyCatch and Angler's Atlas, Prince George, Canada

9 <sup>3</sup> Deeper, Vilnius, Lithuania

10 <sup>4</sup> Institute for Marine and Antarctic Studies, University of Tasmania, Hobart, Australia

## 11 **Abstract**

12  
13  
14 Citizen science platforms, social media and multiple smart phone applications enable  
15 collection of large amounts of georeferenced images. This provides a huge opportunity in  
16 biodiversity and ecological research, but also creates challenges for efficient data handling  
17 and processing. Recreational and small-scale fisheries is one of the fields that could be  
18 revolutionised by efficient, widely accessible and machine learning based processing of  
19 georeferenced images. The majority of non-commercial inland and coastal fisheries are  
20 considered data poor and are rarely assessed, yet they provide multiple societal benefits and  
21 can have large ecological impacts. Given that large quantities of fish observations and images  
22 are being collected by fishers every day, artificial intelligence (AI) and computer vision  
23 applications offer a great opportunity to improve data collection, automate analyses and  
24 inform management. Yet, to date, many AI image analysis applications in fisheries are  
25 focused on the commercial sector and are not publicly available for community use. In this  
26 study we present an open-source modular framework for large scale image storage, handling,  
27 annotation and automatic classification, using cost- and labour-efficient methodologies. The  
28 tool is based on TensorFlow Lite Model Maker library and includes data augmentation and  
29 transfer learning techniques, applied to different convolutional neural network models. We  
30 demonstrate the implementation of this framework in an example case study for automatic  
31 fish species identification from images taken through a recreational fishing smartphone  
32 application. The framework presented here is highly customisable for further advancement  
33 and community based image collection and annotation.

34  
35  
36 **Keywords:** recreational fisheries; artisanal fisheries; citizen science; deep learning; fish  
37 species identification; image annotation; smart phone applications

## 38 39 40 41 **1. Introduction**

42  
43 More than 80% of global catches occur in fisheries that lack essential data, resources, and  
44 infrastructure for stock assessments to be performed (Costello *et al.* 2020). This is especially  
45 true for recreational fisheries, which, in the developed world at least, continue to grow in  
46 popularity and have important well-being and economic benefits, but remain hard to monitor,  
47 control and assess (Meirelles *et al.* 2020).

49 Given the large number of people engaged in recreational fisheries and generally high level  
50 of technology used, there is a potential for large scale data collection that could greatly  
51 improve our knowledge about recreational catches and the populations' status. There is  
52 generally a strong motivation among recreational fishers to conserve fish stocks and  
53 experience with other groups have shown that engagement in citizen science programs does  
54 not only help to generate large datasets, but also promote awareness and sense of stewardship  
55 (Dickinson *et al.* 2010). For recreational fisheries management, citizen science would be  
56 especially powerful because it could enable collaborative research and management which  
57 has been shown to have clear benefits across the world (Venturelli *et al.* 2017; Harris *et al.*  
58 2021). Therefore, it is urgently due that recreational fisheries management benefits from the  
59 increasing popularity of mobile fishing applications to achieve a step-change in data  
60 collection and angler engagement.

61 Artificial intelligence (AI) has already revolutionised weather forecasting, wildfires disaster  
62 response, health care and transportation. AI and computer vision applications also offer a  
63 great untapped opportunity to transform recreational fisheries management because they  
64 allow rapid processing of large citizen science datasets, including automation of species  
65 identification and potentially also the fish size measurement. Even though research applying  
66 AI in fisheries has been increasing, with about 40 scientific publications per year (Ebrahimi  
67 *et al.* 2021), this is still very limited compared to other fields and mainly applied to  
68 commercial fisheries (e.g. Lekunberri *et al.* 2022; Ovalle *et al.* 2022). Moreover, the  
69 methods, tools and scripts developed in these studies are often not publicly available, limiting  
70 wider uptake, application and community-driven improvement.

71 To help address the issue of limited AI application in recreational and small-scale fisheries  
72 research and management we present a modular open source framework for management and  
73 visual recognition of large image collections. The framework includes steps for 1) data  
74 management (storage and pre-processing), 2) image processing (automatic detection of fishes  
75 from images with pre-trained models, manual annotation of species supported by metadata  
76 and images augmentation) and 3) machine learning model development (train and test  
77 algorithms for species classification and detection). Alongside the framework, we also  
78 summarise currently available open-source tools and provide scripts that can be customised  
79 by researchers and applied to different types of imagery data. We demonstrate the  
80 implementation of the framework and its potential use for recreational fisheries research,  
81 through a pilot study that aims to automate detection of fish species from images uploaded to  
82 a smartphone fishing application. Finally, although this framework is developed for fisheries,  
83 it could also be applied to other areas that require image annotation, processing and  
84 classification.

85  
86

## 87 **2. Framework**

88

89 The framework developed in this study is summarised in figure 1 and is divided into three  
90 main modules: data management, image processing and machine learning. This framework

91 has a variety of applications and the different components and scripts can be customized to  
92 different image classification oriented projects and used for example for species/individual  
93 identification, size estimation and other phenotypic/morphological pattern identification from  
94 images.

95  
96 Computer vision is a branch of computer science which aims to extract information from  
97 images (for example from photos and movies; Prince 2012) and develop visual recognition  
98 systems. Some of the most commonly used methods are image classification and object  
99 detection. Image classification is a technique used to classify or predict the class of a single  
100 object in an image (i.e., single-label classification; Mohri *et al.* 2012). Object detection is  
101 used to detect the location of one or more objects in a given image and then categorise each  
102 object (i.e. predict the class of each object, also called object classification). Object detection  
103 can be achieved by annotating images with a rectangle or bounding box around the object  
104 (see for example dos Santos & Gonçalves 2019).  
105

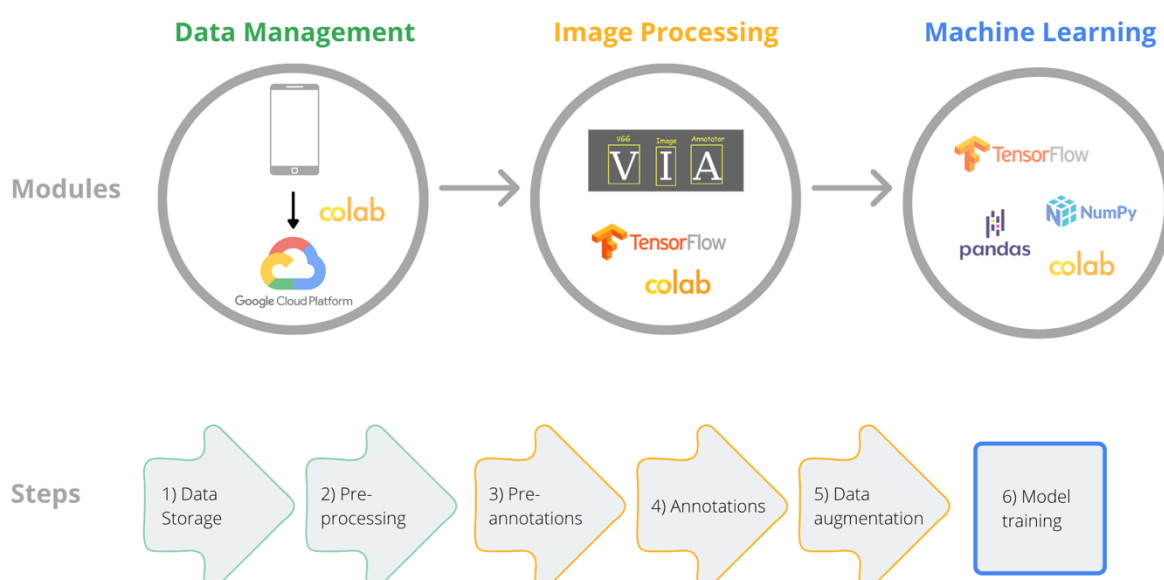

106  
107 Figure 1: Overview of the framework, with the main tools used, consisting of three modules:  
108 and six steps. Platforms and specific tools (e.g. Google colab and Google Cloud Platform)  
109 indicated here were used in the example application, but could be replaced with other tools,  
110 as explained below. All steps described are supported by a freely available code library,  
111 deposited in <https://github.com/FishSizeProject>

112

113

114

115

### 116 *Module 1: Data Management*

117

118 The framework presented here assumes that users already have acquired the images. These  
119 images could have been provided by citizen science programs, social media scans or targeted  
120 image collection.

121

122 Step 1: Storage

123

124 The images and associated metadata are stored on remote servers, i.e. cloud storage. There  
 125 are a number of benefits to cloud storage of large datasets, including costs, facilitated  
 126 collaboration, easy access from multiple devices, access to virtual servers used for analyses  
 127 (see below), efficient back-up, centralization and data protection. Given that many projects  
 128 for image analyses may only require storage for a short period, the costs associated with  
 129 cloud-based storage are likely to be lower than investing into local devices and hard drives.  
 130 From our experience, storage services from the three main cloud storage providers are very  
 131 similar and differ mostly in terminology (Table 1). Pricing structure and billing depend on the  
 132 type of resource needed and is briefly discussed in the “Lessons learned” section. To access  
 133 these services users only need a platform specific account and a payment method. Services  
 134 typically provide a free trial for a limited amount of data and time which varies between  
 135 providers (for example both Google Cloud Platform and Microsoft Azure Platform provide  
 136 \$200 credit to use in 30 days in any service and one of Amazon Web Services include 250  
 137 hours per month to use the ml.t3.medium computer instance).

138

139 **Table 1:** A comparison of the main storage services providers Amazon Web Services (AWS), Google  
 140 Cloud Platform (GCP) and Microsoft Azure Platform (Azure) with specific terminology used by each  
 141 provider.

142

| Service                                                                                          | AWS                         | GCP                             | Azure                                                            |
|--------------------------------------------------------------------------------------------------|-----------------------------|---------------------------------|------------------------------------------------------------------|
| Versioning                                                                                       | ✓                           | ✓                               | ✓                                                                |
| Encryption                                                                                       | ✓                           | ✓                               | ✓                                                                |
| Fine-grained security (multiple criteria can be used for authorization to access data/resources) | ✓                           | ✓                               | ✓                                                                |
| Lower fees for less frequently accessed data                                                     | Infrequently accessed class | Cool Blob (binary large object) | Nearline (frequently accessed), Coldline (infrequently accessed) |
| Archiving                                                                                        | Glacier                     | Archive                         | Archive                                                          |
| Free tier service (use the product for free up to specified limits)                              | ✓                           | ✓                               | ✓                                                                |
| On-demand charges for resources used                                                             | ✓                           | ✓                               | ✓                                                                |

143

144

145

146

147 Step 2: Pre-processing – sensitive data protection

148

149 For all further steps in this study we used Google Colab (Bisong 2019), an online tool with  
 150 built-in (i.e. requires no setup) interactive Python programming environments such as Jupyter  
 151 notebooks (Kluyver *et al.* 2016) and with free access to computing resources such as GPUs

152 (graphics processing units, which are essential for computer vision tasks and image  
153 processing). However, this could be replaced with other tools such as JupyterLab or Kaggle.

154

155 In many cases, images collected by citizens or extracted from internet may contain sensitive  
156 data, such as people's faces. Depending on the nature of subsequent work (e.g. crowdsourced  
157 annotation of images), it may be preferable to remove such data. In this framework we  
158 introduce a step that uses face detection algorithms to remove sensitive data before further  
159 analyses. This is done using the publicly available script *face\_detection\_overlay.ipynb* as a  
160 part of the general framework code. This script uses the function *detect\_face()* of the Python  
161 library CVlib and the pre-trained model *caffemodel* to detect human faces (Ponnusamy 2018).

162

### 163 *Module 2: Image annotation*

164

165 Different computer vision techniques require different types of annotations of images to be  
166 used for training and testing the models. Image annotations are often done manually and this  
167 step is frequently identified as one of the main bottlenecks for using machine learning  
168 approaches. This is particularly true in areas where image annotation for model training  
169 requires expert knowledge such as accurate identification of fish species. In this framework  
170 we focus on image classification and object detection using bounding boxes and do not  
171 include other computer vision tools such as image segmentation. This is because they are the  
172 least time and therefore resource consuming methods, which was an important criterion given  
173 the focus of our study on developing tools for research groups with limited resources.

174

#### 175 Step 3: Pre-annotations – accelerate manual annotation of images

176

177 Although expert based manual annotation of images (into correct species or other groups that  
178 will be used in the model) cannot be avoided, there are several pre-annotation steps that can  
179 reduce the amount of manual work required. Specifically, our framework includes importing  
180 images from cloud storage, running an object detector using the module *inception\_resnet\_v2*  
181 a Keras image classification model pre-trained on Open Images Dataset V4 (Kuznetsova *et*  
182 *al.* 2020), converting the bounding boxes metadata to absolute coordinates and saving the  
183 metadata in VGG format (in a .csv file). The pre-trained object detector was used to place  
184 bounding boxes around all fish shapes in the image, but the model can be used to detect 600  
185 shapes, including elephant, lynx, bird, insect, shellfish, tree, plant and others. The bounding  
186 box step is needed only for algorithms focused on the object detection method, not for image  
187 classification. If users are only interested in classification, the bounding box step can be  
188 skipped. However, automatic detection of specific shapes might still be useful if some images  
189 in the collection don't have the object that needs to be classified. For example, the photos  
190 collected through angler apps may include pictures of location, gear or just accidental images.  
191 Running an object detection step will reduce the amount of work required to sort the images  
192 manually.

193 The scripts for step 3 are available in the notebook *object\_detection\_pre-annotation.ipynb*.

194 The last section of the script includes formatting and saving bounding box coordinates in the  
195 input format required by the software used for manual annotations (VGG software, see

196 below). This section of the script can be easily customised for other formats of annotation  
 197 tools.

198

199 Step 4: Annotations – manual annotation of images

200

201 There is a variety of open-source software for manual image annotation (Table 2) with a  
 202 range of formats for importing and exporting object annotations; each software package  
 203 typically has its own json-based or csv-based format. Some tools are only available online  
 204 and therefore require uploading images to annotation servers. This may limit their application  
 205 for sensitive data or in situations where experts engaged in image annotation have limited  
 206 internet connectivity.

207

208 In this study we used the VGG software (Dutta & Zisserman 2019), as it could be run locally  
 209 and had easy setup and installation. The generated .csv file from the Step 3  
 210 (*object\_detection\_pre-annotation.ipynb*) was opened in the VGG software, where automatic  
 211 pre-annotation of image shapes was inspected manually and corrected if needed (bounding  
 212 boxes adjusted to better fit the object), and class names added. In our case class names  
 213 included identification of fish species and this step required expert knowledge. If class names  
 214 are provided automatically in the pre-annotation step (e.g. the model only aims to classify  
 215 fishes or other shapes), they can also be manually corrected.

216

217 **Table 2:** List of open-source software for image annotation with details about export formats.

218

| Software                         | Export formats                  | Specifications                                                                                   | Web page                                                                                |
|----------------------------------|---------------------------------|--------------------------------------------------------------------------------------------------|-----------------------------------------------------------------------------------------|
| RectLabel                        | YOLO, Create ML, COCO json, csv | Runs locally; only available for MacOS operating system                                          | <a href="https://rectlabel.com/">https://rectlabel.com/</a>                             |
| Scalable                         | json                            | Runs locally; installation in terminal                                                           | <a href="https://scalabel.ai">https://scalabel.ai</a>                                   |
| VGG Image Annotator (via-2.0.11) | csv, VGG json, COCO             | Runs locally; no installation or setup required; fast                                            | <a href="https://gitlab.com/vgg/via">https://gitlab.com/vgg/via</a>                     |
| LabelImg                         | VOC xml, YOLO, createML         | Runs locally; installation in terminal                                                           | <a href="https://github.com/tzutalin/labelImg">https://github.com/tzutalin/labelImg</a> |
| MakeSense                        | Yolo, VOC xml, VGG json, csv    | Runs online but not functional for many images (if web browser resets, all annotations are lost) | <a href="https://www.makesense.ai/">https://www.makesense.ai/</a>                       |
| SuperAnnotate                    | json                            | Runs locally; easy installation (all operating systems)                                          | <a href="https://www.superannotate.com">https://www.superannotate.com</a>               |
| LabelBox                         | json                            | Runs online                                                                                      | <a href="https://labelbox.com/">https://labelbox.com/</a>                               |
| Supervisely                      | json                            | Runs online                                                                                      | <a href="https://supervise.ly/">https://supervise.ly/</a>                               |

219

220 Because TensorFlow Lite Model Maker requires annotations input file in a specific format,  
 221 we have also developed a script (*convert\_annotations\_VGG\_to\_TF.ipynb*) to format the .csv  
 222 file from VGG software to the TensorFlow format. This includes converting bounding boxes

223 coordinates from absolute values generated by the VGG software to relative values needed  
224 for TensorFlow and splitting the dataset into train, test and validation sets.

225

226 Step 5: Data augmentation

227

228 Data augmentation involves creating multiple copies of the same images, but with  
229 transformations such as flipping, rotating, scaling and cropping. Image augmentations have  
230 been shown to combat overfitting in deep convolutional neural networks (Shorten &  
231 Khoshgoftaar 2019), improve performance (Mikołajczyk & Grochowski 2018; Shorten &  
232 Khoshgoftaar 2019), model convergence (Liu *et al.* 2020), generalization and robustness on  
233 out-of-distribution samples (Bengio *et al.* 2011; Hendrycks *et al.* 2020), and, in general, to  
234 have more advantages compared to other methods (Hernández-García & König 2018).  
235 Depending on the method of computer vision used, data augmentation steps will differ. For  
236 example, for image classification data augmentation only involves transformations of the  
237 images. However, for the object detection method, when data augmentation is employed after  
238 annotations, as in this framework, augmentation also needs to be applied to the coordinates of  
239 bounding boxes (i.e. annotations need to be converted to be in agreement with image  
240 transformations).

241

242 In this framework we use the open source Albumentations library (Buslaev *et al.* 2020) for  
243 data augmentation. The script *data\_augmentation\_classification.ipynb* defines an  
244 augmentation pipeline for image classification approach and applies vertical and horizontal  
245 flips for all images in a directory. The script *data\_augmentation\_object\_detection.ipynb* is  
246 used to transform the annotations (bounding boxes) for the object detection method by  
247 applying vertical and horizontal flip to the coordinates of the bounding boxes from the  
248 annotations file.

249

250 *Module 3: Machine learning*

251

252 Step 6: Model training and testing

253

254 This framework uses the Tensorflow Lite Model Maker library (Abadi *et al.* 2016a; b) and  
255 transfer learning which reduces the amount of training data required and model training time.  
256 Tensorflow Lite supports several model architectures, including EfficientNet-Lite,  
257 MobileNetV2 and ResNet50 (He *et al.* 2016; Sandler *et al.* 2018; Tan & Le 2019) which are  
258 pre-trained models for image classification, and EfficientDet-Lite[0-4], a family of mobile  
259 and IoT-friendly models for object detection, derived from the EfficientDet architecture (Tan  
260 *et al.* 2020). The library is flexible and new pre-trained models can be added by customising  
261 the library code.

262

263 For this framework, we developed the script *image\_classification.ipynb* to train and test  
264 (evaluate) an image classification model using the pre-trained models mentioned above. This  
265 script also generates a confusion matrix for visualizing model performance and functions to

266 load a trained model and run classification inference on new images. The script  
267 *object\_detection.ipynb* includes functions to train and test an object detection model.

268  
269

### 270 3. Pilot case-study

271

272 To illustrate the feasibility of the framework developed here, we present a pilot case-study of  
273 detecting the species Common bream (*Abramis brama*), European carp (*Cyprinus carpio*),  
274 Northern pike (*Esox lucius*), Largemouth bass (*Micropterus salmoides*), European perch  
275 (*Perca fluviatilis*) and Pikeperch (*Sander lucioperca*) (Figure 2). Images were obtained  
276 through a collaborative agreement with a company Fish Deeper™, which provides fishfinder  
277 devices which are popular among anglers and runs a smart phone application enabling  
278 anglers to log their catch. The anonymous data obtained included images and associated  
279 metadata, such as fish species identification by the user, GPS coordinates and other  
280 information. After the automated pre-annotation to select only images with fish, the manual  
281 image annotation was done by one person (Justas Dainys) with the required expertise in fish  
282 species identification (see discussion at the end for more details about the time used in this  
283 step). Next, we applied image augmentation (vertical and horizontal flips) to increase the  
284 number of images for model training, which provided 3 additional images for each original  
285 photo and resulted in a total of 4809 images.

286

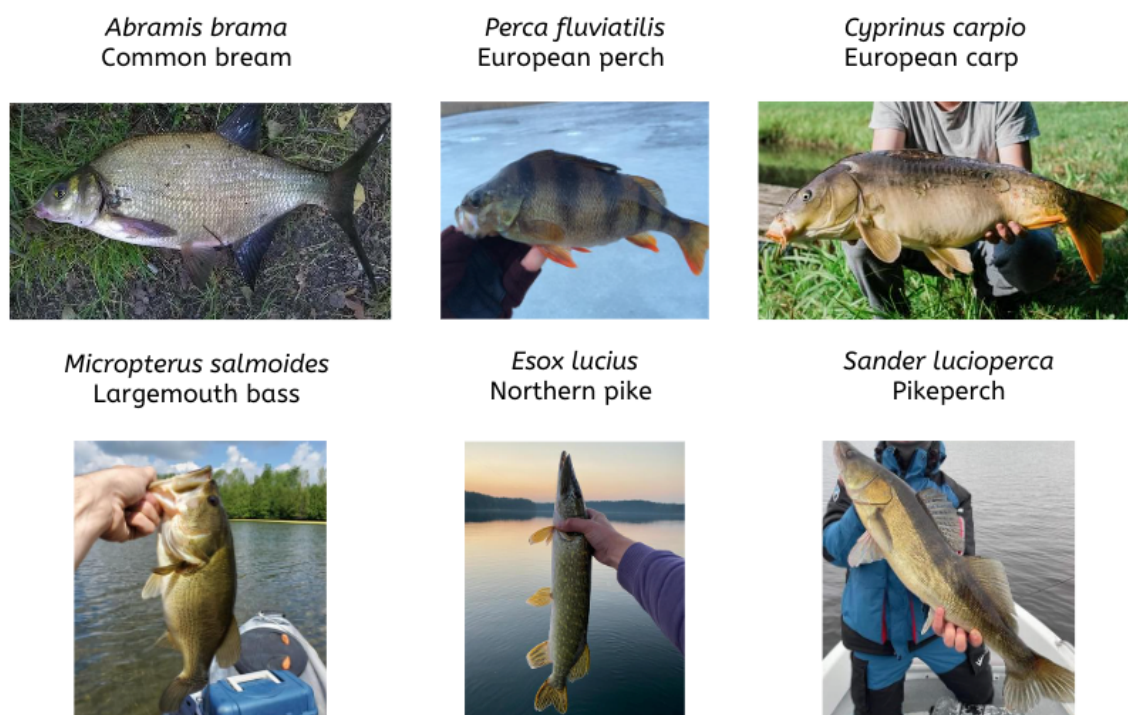

287  
288 Figure 2: Example of images used for training the model, for each class (fish species)

289  
290



291 **Table 3:** Sample sizes (images annotated) for both techniques: image classification and object  
 292 detection.

| Species                      | Common name     | Number of annotated images | Total number of images (after augmentation) |
|------------------------------|-----------------|----------------------------|---------------------------------------------|
| <i>Abramis brama</i>         | Common bream    | 111                        | 333                                         |
| <i>Cyprinus carpio</i>       | European carp   | 377                        | 1131                                        |
| <i>Esox lucius</i>           | Northern pike   | 420                        | 1260                                        |
| <i>Micropterus salmoides</i> | Largemouth bass | 175                        | 525                                         |
| <i>Perca fluviatilis</i>     | European perch  | 332                        | 996                                         |
| <i>Sander lucioperca</i>     | Pikeperch       | 188                        | 564                                         |

293  
 294 The best performance for the image classification was achieved when using EfficientNet-  
 295 Lite0 model architecture, a batch size of 32 and 20 epochs, with an overall accuracy of 0.91  
 296 and mean loss of 0.71 (Figure 3). Many classes had high precision values, although the  
 297 precision for *Sander lucioperca* was quite low. From the confusion matrix (Figure 3), *Sander*  
 298 *lucioperca* were commonly mistaken for *Esox lucius*, *Abramis brama* and *Perca fluviatilis*.

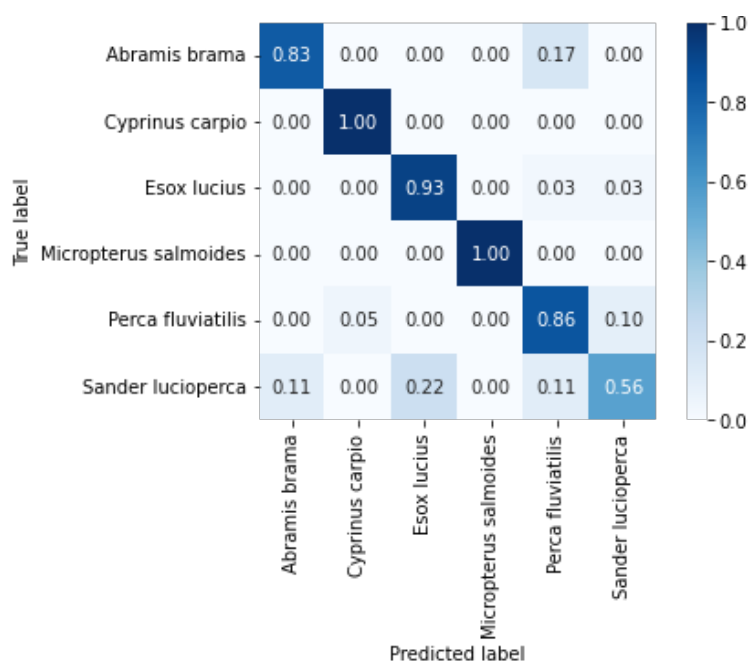

309  
 310 Figure 3: Confusion matrix of the image classification results with normalized, relative  
 311 values of correct predictions for each species (i.e. precision) obtained when using  
 312 EfficientNet-Lite0 model architecture, a batch size of 32 and 20 epochs.

313  
 314 For object detection, the best overall precision obtained was 0.48 when using EfficientDet-  
 315 Lite0 model architecture, a batch size of 32 and 20 epochs (Table 4). Interestingly, only the  
 316 class *Cyprinus carpio* exhibited high precision, indicating that the size of the training dataset  
 317 by itself might not be the only indicator of model performance. Similarly to what other  
 318 researchers found (e.g. Horn *et al.* 2017; Zheng *et al.* 2019), our results show that the  
 319 classification method achieve higher overall performance when compared to the overall  
 320 performance of the detection methods. Training the model with larger number of images, a

321 balanced dataset and optimizing hyperparameters (such as epochs and batch size) may  
322 improve model performance.

323 **Table 4:** Precision values for the best performing object detection model (model architecture =  
324 EfficientDet-Lite0, batch size = 32, epochs = 20)

| Species                      | Common name     | Precision |
|------------------------------|-----------------|-----------|
| All (Average Precision)      |                 | 0.48      |
| <i>Abramis brama</i>         | Common bream    | 0.20      |
| <i>Cyprinus carpio</i>       | European carp   | 0.75      |
| <i>Esox lucius</i>           | Northern pike   | 0.55      |
| <i>Micropterus salmoides</i> | Largemouth bass | 0.53      |
| <i>Perca fluviatilis</i>     | European perch  | 0.31      |
| <i>Sander lucioperca</i>     | Pikeperch       | 0.53      |

325  
326

#### 327 **4. Lessons learned, challenges and future applications**

328

329 In our pilot case study we illustrate the scientific application, utility and potential for  
330 scalability of the framework presented here. The framework is flexible and can be customised  
331 and applied to a variety of image datasets and research questions. With a relatively small  
332 number of images per class (200-300) we demonstrate that a high performing model can be  
333 developed for a small number of classes by a small research group with few resources.  
334 Traditional deep learning-based approaches require training models on a dedicated server and  
335 high computational power to make the inference. To overcome this issue, this framework  
336 uses the Tensorflow Lite Model Maker library (Abadi et al. 2016a; b) and transfer learning  
337 which reduces the amount of training data required as well as model training time. In  
338 addition, this library is very flexible and new pre-trained models can be added by customising  
339 the library code.

340

341 While applying the framework to our pilot case study we have used a total of 59.39 GiB of  
342 cloud storage and computer resources included 16 vCPUs, 60 GB RAM and a Nvidia Tesla  
343 P4 GPU which resulted in a total of €117.20 (usage for three months). The cloud storage was  
344 used during the three month period and total expenses related to this service were €12.81.  
345 However, it is important to note that the costs were also kept low because we took advantage  
346 of free online tools with Python programming environments and free computing resources  
347 (Google colab) for most of exploratory work. Paid services of compute engine resources and  
348 notebooks were used only for intensive model runs.

349

350 We found that in the steps 2 and 3 the pre-trained model for detecting human faces or fish  
351 shapes were not always accurate. The pre-trained model *caffemodel* that was used to detect  
352 human faces sometimes failed to detect a face if it was not in a vertical position, as was the  
353 case in rotated images. False positives also occurred when the model placed bounding boxes  
354 on fish “faces”. This step could be improved by training a model to detect human faces using

355 augmented data with transformations such as image rotation or vertical flip. Still, for images  
356 that need to be crowdsourced to public domains, for e.g., manual annotations or citizen  
357 science projects, the potential for sensitive data leakage must be carefully addressed.  
358 When it comes to detecting fish shapes and placing bounding boxes around them, in most  
359 cases the pretrained model *inception\_resnet\_v2* worked well, although often the box  
360 excluded small parts of the fish (usually end of the tail). However, when there were many  
361 overlapping fishes in the image, the model did not always detect all fishes in an image. In a  
362 few images, the pretrained model identified other object (e.g. shoes, boxes, etc.) as fish.

363

364 *Manual annotation is fast but might be even faster*

365

366 Manual annotation of images was identified as an important challenge, where expert  
367 knowledge was crucial for correctly identifying fish species. The pre-annotation step (step 3)  
368 accelerated the process by automatically adding bounding boxes around fish, but images still  
369 needed to be individually assessed and identified. On average, for the six common and  
370 clearly distinct species, annotating one photo took about 2-3 seconds (although in some cases  
371 separating the common bream from other similar species took longer). In our case all  
372 annotated photos were divided into separate folders, depending on the month they were  
373 taken. Each folder contained c. 2000-2500 photos and up to half of them did not include any  
374 fish. In general, to review and annotate all the photos in the folder it took approximately 2-3  
375 hours of intensive work by a highly skilled expert. This might be slowed down, depending on  
376 the speed of the computer and internet, or expertise level. As the model is developed and  
377 more species are added, new photos can be identified faster by applying the model to them  
378 first and then manually processing only those photos that had low classification score.

379

380 Citizen scientists can also supplement manual annotation of images for ML projects. For  
381 example, Gundelund *et al.* (2021) show that citizen scientists can estimate fisheries metrics  
382 and identify species with results comparable to surveys by scientists. If images can be shared  
383 publicly, crowdsourcing citizen science platforms Zooniverse (<https://www.zooniverse.org/>)  
384 could speed up the annotation and its accuracy. For example, Anton *et al.* (2021) used the  
385 platform to engage many citizen scientists to efficiently and accurately annotate data  
386 from underwater footage to detect cold water corals. To ensure higher accuracy the authors  
387 used repeated annotations, i.e. each video clip was annotated by eight citizen scientists and an  
388 agreement threshold of 80% was used.

389

390 Like other researchers (e.g. Lekunberri *et al.* 2022), we found that image augmentation  
391 through rotation and flips improved the image classification model performance (overall  
392 accuracy increased by 10%). The augmentation was easy, fast and straightforward and we  
393 recommend using it in most image classification and object detection applications.

394

395 In our pilot case study, the process of model training using the classification technique took  
396 6903 seconds (approximately 2 hours), while using the object detection technique it took  
397 3906 seconds (approximately 1 hour) for the same number of images (n=4809) batches  
398 (n=32) and epochs (n=20) but a different model architecture (EfficientNet-Lite0 and

399 EfficientDet-Lite0 respectively). The time required for the training phase of a model is an  
400 important consideration when choosing which computer vision technique to use. For the  
401 same amount of data and hyperparameter space (batch size and epochs) image classification  
402 can require more time to train a model, when comparing to the object detection technique.  
403 However, to achieve higher performance, object detection methods might need larger amount  
404 of data and more time for hyperparameters optimization. In addition, the time consuming  
405 process of manual annotation of images for object detection is also important to consider.  
406

407 In fisheries contexts, the majority of image processing and classification models aim to  
408 automatically identify fish species and are developed at the regional level, and are often  
409 fisheries-specific (Lekunberri *et al.* 2022; Ovalle *et al.* 2022; Palmer *et al.* 2022). Even  
410 though groups use different techniques (such as image classification, object detection and  
411 segmentation) these individual (and regional) models could be combined into a global,  
412 hierarchical classification framework for automatically identifying fish species worldwide.  
413 The process of combining different machine learning models is called ensemble learning.  
414 Usually, an ensemble classification model consists of two steps: (1) generating classification  
415 results using multiple weak classifiers, and (2) integrating multiple results into a consistency  
416 function to get the final result with voting schemes (Dong *et al.* 2020). There are different  
417 methods of ensemble learning with their own advantages and disadvantages (reviewed in  
418 Dong *et al.* 2020) and this area of research is rapidly evolving. However, ensemble learning  
419 has already been recognised to improve the performance of individual models and building a  
420 new model by ensemble learning requires less time, data and computational resources than  
421 training a new model with all the data combined.  
422

423 Global open-access machine learning models would have a range of applications for research  
424 and fisheries management. Platforms such as iNaturalist and Fishbase.org could benefit from  
425 fisheries-specific models or models developed at regional levels which can be combined by  
426 ensemble learning. Data collection can be further accelerated as tasks such as automatic fish  
427 identification, size estimation or sex determination can be speeded up with model predictions  
428 therefore helping citizen scientists with the process of metadata entry. In return, research  
429 projects and management efforts could take advantage of these platforms and data.  
430

431

432

### 433 **References:**

434

435 Abadi M, Agarwal A, Barham P, Brevdo E, Chen Z, Citro C, Corrado GS, Davis A, Dean J,  
436 Devin M, Ghemawat S, Goodfellow I, Harp A, Irving G, Isard M, Jia Y, Jozefowicz R,  
437 Kaiser L, Kudlur M *et al.* (2016a) TensorFlow: Large-Scale Machine Learning on  
438 Heterogeneous Distributed Systems. *arXiv*.

439 Abadi M, Barham P, Chen J, Chen Z, Davis A, et al . (2016b) TensorFlow.js. In: *Proceedings*  
440 *of the 12th USENIX Symposium on Operating Systems Design and Implementation*

441 Anton V, Germishuys J, Bergström P, Lindegarth M, Obst M (2021) An open-source, citizen  
442 science and machine learning approach to analyse subsea movies. *Biodiversity Data*

443 *Journal*, **9**, 1–14.

- 444 Bengio Y, Bastien F, Bergeron A, Boulanger-Lewandowski N, Breuel T, Chherawala Y,  
445 Cisse M, Côté M, Erhan D, Eustache J, Glorot X, Muller X, Lebeuf SP, Pascanu R,  
446 Rifai S, Savard F, Sicard G (2011) Deep learners benefit more from out-of-distribution  
447 examples. *Proceedings of the Fourteenth International Conference on Artificial  
448 Intelligence and Statistics*, **15**, 164–172.
- 449 Bisong E (2019) Building Machine Learning and Deep Learning Models on Google Cloud  
450 Platform. In: *Building Machine Learning and Deep Learning Models on Google Cloud  
451 Platform*, pp. 59–64. Berkeley, CA.
- 452 Buslaev A, Iglovikov VI, Khvedchenya E, Parinov A, Druzhinin M, Kalinin AA (2020)  
453 Albumentations: Fast and flexible image augmentations. *Information*, **11**, 1–20.
- 454 Costello C, Ovando D, Hilborn R, Gaines SD, Deschenes O, Lester SE (2020) Status and  
455 Solutions for the World’s Unassessed Fisheries. *Science*, **338**, 517–521.
- 456 Dickinson JL, Zuckerberg B, Bonter DN (2010) Citizen science as an ecological research  
457 tool: Challenges and benefits. *Annual Review of Ecology, Evolution, and Systematics*,  
458 **41**, 149–172.
- 459 Dong X, Yu Z, Cao W, Shi Y, Ma Q (2020) A survey on ensemble learning. *Frontiers of  
460 Computer Science*, **14**, 241–258.
- 461 Dutta A, Zisserman A (2019) The VIA annotation software for images, audio and video. *MM  
462 2019 - Proceedings of the 27th ACM International Conference on Multimedia*, 2276–  
463 2279.
- 464 Ebrahimi SH, Ossewaarde M, Need A (2021) Smart fishery: A systematic review and  
465 research agenda for sustainable fisheries in the age of ai. *Sustainability (Switzerland)*,  
466 **13**.
- 467 Gundelund C, Venturelli P, Hartill BW, Hyder K, Olesen HJ, Skov C (2021) Evaluation of a  
468 citizen science platform for collecting fisheries data from coastal sea trout anglers.  
469 *Canadian Journal of Fisheries and Aquatic Sciences*, **78**, 1576–1585.
- 470 Harris D, Johnston D, Yeoh D (2021) More for less: Citizen science supporting the  
471 management of small-scale recreational fisheries. *Regional Studies in Marine Science*,  
472 **48**, 102047.
- 473 He K, Zhang X, Ren S, Sun J (2016) Deep residual learning for image recognition.  
474 *Proceedings of the IEEE Computer Society Conference on Computer Vision and Pattern  
475 Recognition*, 770–778.
- 476 Hendrycks D, Mu N, Cubuk ED, Zoph B, Gilmer J, Lakshminarayanan B (2020) AugMix: A  
477 Simple Data Processing Method to Improve Robustness and Uncertainty. In:  
478 *Proceedings of the International Conference on Learning Representations (ICLR)*, pp.  
479 1–15.
- 480 Hernández-García A, König P (2018) Further advantages of data augmentation on  
481 convolutional neural networks. In: *Lecture Notes in Computer Science (including  
482 subseries Lecture Notes in Artificial Intelligence and Lecture Notes in Bioinformatics)*,  
483 pp. 95–103.
- 484 Horn G Van, Mac O, Shepard A, Adam H, Song Y, Cui Y, Sun C, Perona P, Belongie S  
485 (2017) The iNaturalist Species Classification and Detection Dataset - Supplementary  
486 Material. *Computer Vision Foundation*, 4–6.
- 487 Kluyver T, Ragan-Kelley B, Pérez F, Granger B, Bussonnier M, Frederic J, Kelley K,  
488 Hamrick J, Grout J, Corlay S, Ivanov P, Avila D, Abdalla S, Willing C (2016) Jupyter  
489 Notebooks—a publishing format for reproducible computational workflows. *Positioning  
490 and Power in Academic Publishing: Players, Agents and Agendas - Proceedings of the  
491 20th International Conference on Electronic Publishing, ELPUB 2016*, 87–90.
- 492 Kuznetsova A, Rom H, Alldrin N, Uijlings J, Krasin I, Pont-Tuset J, Kamali S, Popov S,  
493 Mallocci M, Kolesnikov A, Duerig T, Ferrari V (2020) The Open Images Dataset V4:

- 494 Unified Image Classification, Object Detection, and Visual Relationship Detection at  
495 Scale. *International Journal of Computer Vision*, **128**, 1956–1981.
- 496 Lekunberri X, Ruiz J, Quincoces I, Dornaika F, Arganda-Carreras I, Fernandes JA (2022)  
497 Identification and measurement of tropical tuna species in purse seiner catches using  
498 computer vision and deep learning. *Ecological Informatics*, **67**.
- 499 Liu S, Papailiopoulos D, Achlioptas D (2020) Bad global minima exist and SGD can reach  
500 them. *Advances in Neural Information Processing Systems*, **2020-Decem**.
- 501 Meirelles K, Freire F, Belhabib D, Espedido JC, Hood L, Kleisner KM, Lam VWL, Machado  
502 ML, Mendonça JT, Meeuwig JJ, Moro PS, Motta FS, Palomares MD, Smith N, Teh L,  
503 Zeller D, Zyllich K, Pauly D, Purcell SW *et al.* (2020) Estimating Global Catches of  
504 Marine Recreational Fisheries. *Frontiers in Marine Science*, **7**, 1–18.
- 505 Mikołajczyk A, Grochowski M (2018) Data augmentation for improving deep learning in  
506 image classification problem. In: *2018 International Interdisciplinary PhD Workshop,*  
507 *IIPhDW 2018*, pp. 117–122.
- 508 Mohri M, Rostamizadeh A, Talwalkar A (2012) *Foundations of Machine Learning*. MIT  
509 Press, Cambridge, MA.
- 510 Ovalle JC, Vilas C, Antelo LT (2022) On the use of deep learning for fish species recognition  
511 and quantification on board fishing vessels. *Marine Policy*, **139**, 105015.
- 512 Palmer M, Álvarez-Ellacuría A, Moltó V, Catalán IA (2022) Automatic, operational, high-  
513 resolution monitoring of fish length and catch numbers from landings using deep  
514 learning. *Fisheries Research*, **246**.
- 515 Ponnusamy A (2018) cvlib - high level Computer Vision library for Python.
- 516 Prince SJD (2012) *Computer vision: Models, learning and inference*. Cambridge University  
517 Press.
- 518 Sandler M, Howard A, Zhu M, Zhmoginov A, Chen LC (2018) MobileNetV2: Inverted  
519 Residuals and Linear Bottlenecks. *Proceedings of the IEEE Computer Society*  
520 *Conference on Computer Vision and Pattern Recognition*, 4510–4520.
- 521 dos Santos AA, Gonçalves WN (2019) Improving Pantanal fish species recognition through  
522 taxonomic ranks in convolutional neural networks. *Ecological Informatics*, **53**, 100977.
- 523 Shorten C, Khoshgoftaar TM (2019) A survey on Image Data Augmentation for Deep  
524 Learning. *Journal of Big Data*, **6**.
- 525 Tan M, Le Q V. (2019) EfficientNet: Rethinking model scaling for convolutional neural  
526 networks. *36th International Conference on Machine Learning, ICML 2019*, 10691–  
527 10700.
- 528 Tan M, Pang R, Le Q V. (2020) EfficientDet: Scalable and efficient object detection.  
529 *Proceedings of the IEEE Computer Society Conference on Computer Vision and Pattern*  
530 *Recognition*, 10778–10787.
- 531 Venturelli PA, Hyder K, Skov C (2017) Angler apps as a source of recreational fisheries data:  
532 opportunities, challenges and proposed standards. *Fish and Fisheries*, **18**, 578–595.
- 533 Zheng YY, Kong JL, Jin XB, Wang XY, Su TL, Zuo M (2019) Cropdeep: The crop vision  
534 dataset for deep-learning-based classification and detection in precision agriculture.  
535 *Sensors (Switzerland)*, **19**.

536  
537

538 **Funding Information:** This study has received funding from European Regional  
539 Development Fund (project No 01.2.2-LMT-K-718-02-0006) under grant agreement with the  
540 Research Council of Lithuania (LMTLT).

541

542 **Conflict of Interest:** the authors declare no conflict of interest.

543

544 **Data availability:** All steps described and scripts used are supported by a freely available  
545 code library, deposited in [github.com/FishSizeProject](https://github.com/FishSizeProject)

546

547
